# Supplementary material
Source: Research Square preprint supplement (doi:10.21203/rs.3.rs-9743910/v1)
Supplement: Supplementary file 1 [file f25b9e30f513c881cf8144a0.docx]

**Pre-treatment ¹⁸F-FDG PET Radiomics for Predicting Chemoradiotherapy Response in Locally Advanced NSCLC: A Multicenter Evaluation of Feature Selection Strategies**

**Supplementary**

| Table 1 | Patient demographics and clinical characteristics | …….(2) |
| --- | --- | --- |
| Table 2 | Summary of image acquisition and reconstruction parameters across the three scanner manufacturers | …….(3) |
| Fig 1 | Schematic workflow for the evaluation of radiomics feature selection methods in predicting chemoradiation response in locally advanced NSCLC using pre-treatment [¹⁸F]-FDG PET imaging | …….(4) |
| Table 3 | Radiomic features extracted from original PET images, including shape, first order, and texture | …….(5) |
| Features selection methods | | …….(6) |
| Fig 2 | Radiomic feature distributions across scanners before and after ComBat harmonization. (a) First order_Variance; (b) GLDM_small dependence high gray level emphasis | …….(7) |
| Fig.3 | Heatmap of Radiomic Features After Spearman Correlation Filtering and Redundancy Removal | ……(8) |
| Table 4 | Hyperparameters of machine learning algorithms. | …….(9) |

**Table 1.** Patient demographics and clinical characteristics [1]

| Clinical characteristics | Value |
| --- | --- |
| Total number of patients | 167 |
| Age, years |  |
| Range (median) | 37 - 82 (65) |
| Clinical stage |  |
| IIB | 6 (3.6%) |
| IIIA | 89 (53.3%) |
| IIIB | 71 (42.5%) |
| Other | 1 (0.6%) |
| Sex |  |
| Male | 108 (64.7%) |
| Female | 59 (35.3%) |
| Location of primary tumor |  |
| Right upper lobe | 59 (35.33%) |
| Right lower lobe | 33 (19.76%) |
| Middle lobe | 24 (14.37%) |
| Left upper lobe | 48 (28.74%) |
| Left lower lobe | 12 (7.18%) |

**Table 2**. Summary of image acquisition and reconstruction parameters across the three scanner manufacturers [1]

| Number of patient* | Manufacturer | | |  |
| --- | --- | --- | --- | --- |
| Siemens | GE | Philip | p-value |
| 71 | 76 | 20 |  |
| Pixel size [mm, min - max (median)] | 2.65-5.33 (4.06) | 3.91-5.47 (4.69) | 4 (4) | 0.0026 |
| Slice thickness [mm, min - max (median)] | 2-5 (3.38) | 3.27-4.25 (3.27) | 4-5 (4) | 2.20 × 10⁻⁴ |
| Reconstruction Algorithm | OSEM & PSF | OSEM & 3D IR | LOR-RAMLA |  |
| Randoms Correction | DLYD | DLYD, RTSUB, & SING | DLYD & SING |  |
| Attenuation Correction | CT-derived & measured,AC_CT | measured (0.096000 cm-1) | ellipse model & ss-simul |  |
| Scatter Correction | model-based | convolution subtraction & model-based | Nonuniform & ss-simul |  |

*Combat harmonization requirement for minimum number of patients (~20-30 per batch) [2].

OSEM = ordered subset expectation maximization; LOR-RAMLA = line-of-response row-action maximum likelihood algorithm; SS-SIMUL = single-scatter simulation method; RTSUB = real-time delayed event subtraction method; DLYD = delayed event subtraction method; SING = singles-based correction method

**Fig 1**. Schematic workflow for the evaluation of radiomics feature selection methods in predicting chemoradiation response in locally advanced NSCLC using pre-treatment

[¹⁸F]-FDG PET imaging.

**Table 3**. Radiomic features extracted from original PET images, including shape, first order, and texture. Texture features are categorized as follows: GLCM: gray-level co-occurrence matrix, GLRLM: gray-level run length matrix, GLSZM: gray-level size zone matrix, GLDM: gray-level dependence matrix, NGTDM: neighboring gray tone difference matrix.

| **Features** | **Sub Features** |
| --- | --- |
| Shape  (n = 14) | elongation, flatness, least axis length, major axis length, maximum 2ddiameter column, maximum2ddiameterrow, maximum 2ddiameter slice, maximum 3ddiameter, mesh volume, minor axis length, sphericity, surface area, surface volume ratio, voxel volume |
| Firstorder  (n = 18) | 10 percentile, 90 percentile, energy, entropy, interquartile range, kurtosis, maximum, mean absolute deviation, mean, median, minimum, range, robust mean absolutedeviation, root mean squared, skewness, total energy, uniformity, variance |
| GLCM  (n = 22) | autocorrelation, jointaverage, cluster prominence, cluster shade, cluster tendency, contrast, correlation, difference average, difference entropy, difference variance, joint energy, joint entropy, imc1, imc2, idm, idmn, id, idn, inverse variance, maximum probability, sum entropy, sum squares |
| GLRLM  (n = 16) | gray level non uniformity, gray level non uniformity normalized, gray level variance, high gray level run emphasis, long run emphasis, long run high gray level emphasis, long run low gray level emphasis, low gray level run emphasis, run entropy, run length non uniformity, run length non uniformity normalized, run percentage, run variance, short run emphasis, short run high gray level emphasis, short run low gray level emphasis |
| GLSZM  (n = 16) | gray level non uniformity, gray level non uniformity normalized, gray level variance, high gray level zone emphasis, large area emphasis, large area high gray level emphasis, large area low gray level emphasis, low gray level zone emphasis, size zone non uniformity, size zone non uniformity normalized, small area emphasis, small area high gray level emphasis, small area low gray level emphasis, zone entropy, zone percentage, zone variance |
| GLDM  (n = 14) | dependence entropy, dependence non uniformity, dependence non uniformity normalized, dependence variance, gray level non uniformity, gray level variance, high gray level emphasis, large dependence emphasis, large dependence highgraylevel emphasis, large dependence low gray level emphasis, low gray level emphasis, small dependence emphasis, small dependence high gray level emphasis, small dependence low gray level emphasis |
| NGTDM  (n = 5) | busyness, coarseness, complexity, contrast, strength |

**Features selection methods**

1. Filter methods: Minimum Redundancy Maximum Relevance (mRMR) selects features that are highly relevant to the outcome while minimizing feature redundancy. The mRMR method employs the Mutual Information Quotient (MIQ) approach and does not require hyperparameter optimization. Features are ranked based on their relevance to the target variable and minimal redundancy. This process is implemented in Python using the pymrmr package.
2. Embedded methods, including the Least Absolute Shrinkage and Selection Operator (L1-LASSO) and random forest feature importance (RF-FI), were used. LASSO with L1 regularization reduces the coefficients of less relevant features to zero, promoting sparsity. The regularization parameter λ is optimized over the range [0.0001–10] using stratified 10-fold cross-validation. Model settings include a penalty set to “L1”, solver as “saga”, and max_iter as 10,000. RF-FI evaluates the relative contribution of each feature based on its importance weight in the Random Forest model. For RF-FI, hyperparameter optimization was performed using GridSearchCV with Stratified 10-Fold Cross-Validation, considering parameters such as max_depth, min_samples_leaf, min_samples_split, and n_estimators.
3. Wrapper methods: Recursive Feature Elimination (RFE) constructs a model using all features and iteratively removes those with the lowest contribution. In this study, RFE was implemented with the random forest (RF) algorithm, and hyperparameter optimization was performed using GridSearchCV with Stratified 10-Fold Cross-Validation, considering parameters such as max depth, min samples leaf, min samples split, and n estimators. Once optimal parameters were identified, the RFE process was conducted in stages to select the most relevant features. Feature selection for the embedded and wrapper methods was performed in Python using the sklearn linear model, sklearn model selection, and sklearn ensemble packages.

**Supplementary Figure 2** illustrates the distribution of representative radiomic features across PET images acquired from different scanners before and after ComBat harmonization. Specifically, the figure presents two representative features from different radiomic classes: (a) *First-order Variance* and (b) *GLDM Small Dependence High Gray Level Emphasis*. Prior to harmonization, noticeable variations in feature distributions were observed among scanners from different vendors, indicating the presence of scanner-related batch effects. After applying the ComBat method, these inter-scanner discrepancies were substantially reduced, leading to more consistent feature distributions across imaging systems while preserving the intrinsic biological variability of the tumor data. This harmonization step minimized technical variability associated with scanner differences.

(b)

(a)

**Fig 2**. Radiomic feature distributions across scanners before and after ComBat harmonization. (a) First order_Variance; (b) GLDM_small dependence high gray level emphasis

**Fig 3**. Heatmap of Radiomic Features After Spearman Correlation Filtering and Redundancy Removal

**Table 4**. Hyperparameters of machine learning algorithms.

| No | Algorithm | Hyperparameter | Description | Value Range |
| --- | --- | --- | --- | --- |
| 1 | SVM | C | Regularization parameter | [1e-5, 1000] |
| Kernel | Type of kernel function | {'linear', polynomial', 'rbf', 'sigmoid'} |
| Gamma | Kernel coefficient | [1e-5, 10] |
| 2 | RF | n_estimators | Number of decision trees in the ensemble model | [10, 1000] |
| max_depth | Maximum depth of the decision trees | [5, 30] |
| min_samples_split | Minimum number of samples required to split an internal node | [2, 20] |
| min_samples_leaf | Minimum number of samples required at a leaf node | [1, 10] |
| 3 | LR | Penalty | Type of regularization | (L1, L2, Elastic Net) |
| Solver | Optimization algorithm used for model training | {'liblinear','saga','newton-cg','lbfgs’} |
| C | Regularization strength parameter controlling model complexity | [1e-5, 1000] |
| l1_ratio | Proportion of L1 penalty in Elastic Net regularization | [0.1, 0.9] |
| 4 | XGBoost | n_estimators | Number of decision trees built iteratively during the boosting process | [10, 1000] |
| max_depth | Maximum depth of individual trees used as base learners | [1, 11] |
| learning_rate | Boosting learning rate | [1e-5, 1] |
| subsample | Proportion of training samples randomly selected for each tree | [0, 1] |
| colsample_bytree | Proportion of features randomly selected for each tree | [0, 1] |

**Reference**

1. Kinahan, P., Muzi, M., Bialecki, B., Herman, B., & Coombs, L. (2019). Data from the ACRIN 6668 Trial NSCLC-FDG-PET (Version 2) [Data set]. The Cancer Imaging Archive. <https://doi.org/10.7937/tcia.2019.30ilqfcl>
2. Orlhac, F., Frouin, F., Nioche, C., Ayache, N., & Buvat, I. (2022). A guide to ComBat harmonization of imaging biomarkers in multicenter studies. Journal of Nuclear Medicine, 63(2), 263–270. https://doi.org/10.2967/jnumed.121.262464
